# Supplementary material for: Temperature-responsive biodegradable star-shaped block copolymers for vaginal gels
Source: Royal Society of Chemistry journal article supplement (doi:10.1039/c2jm15541a), 2012-01-01
Supplement: c2jm15541a.pdf [file c2jm15541a.pdf]

## Supporting information

# Temperature-responsive biodegradable star-shaped block copolymers for vaginal gels

*Peng Zou, Jinping Suo\*, Lei Nie, and Shuibin Feng*

State Key Laboratory of Mould Technology, College of Materials Science and Engineering, Huazhong University of Science and Technology (HUST), Wuhan

430074, PR China

Fax/Tel: 86 27 87558055; E-mail: [jinpingsuo@mail.hust.edu.cn](mailto:jinpingsuo@mail.hust.edu.cn)

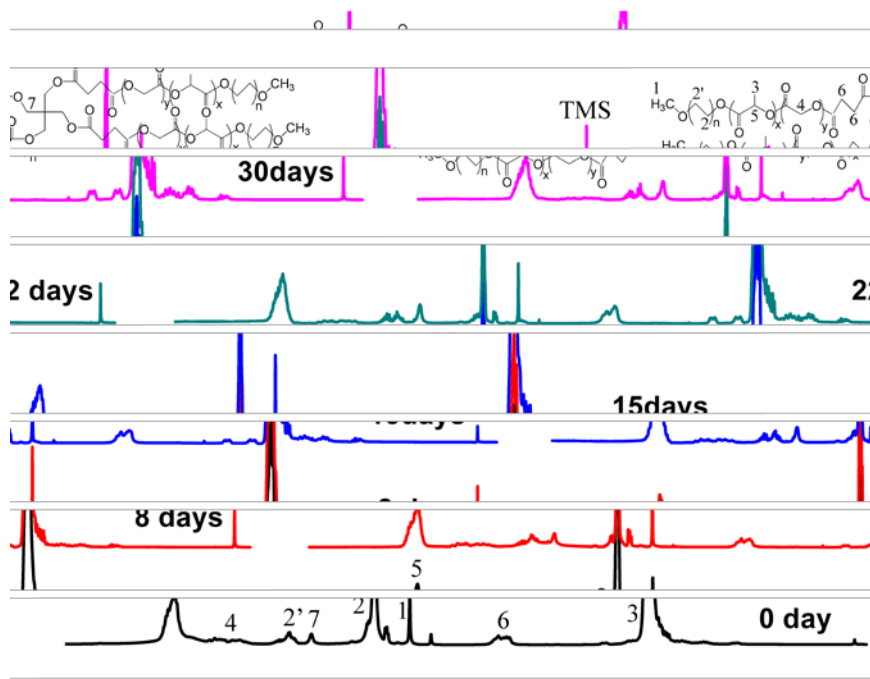

**Figure 1s.** Changes in  $^1\text{H}$  NMR spectrum during the in vivo degradation of remaining 4sPLGA1320-mPEG550 copolymers with LA/GA mol ratio=9:1 in  $\text{CDCl}_3$ .

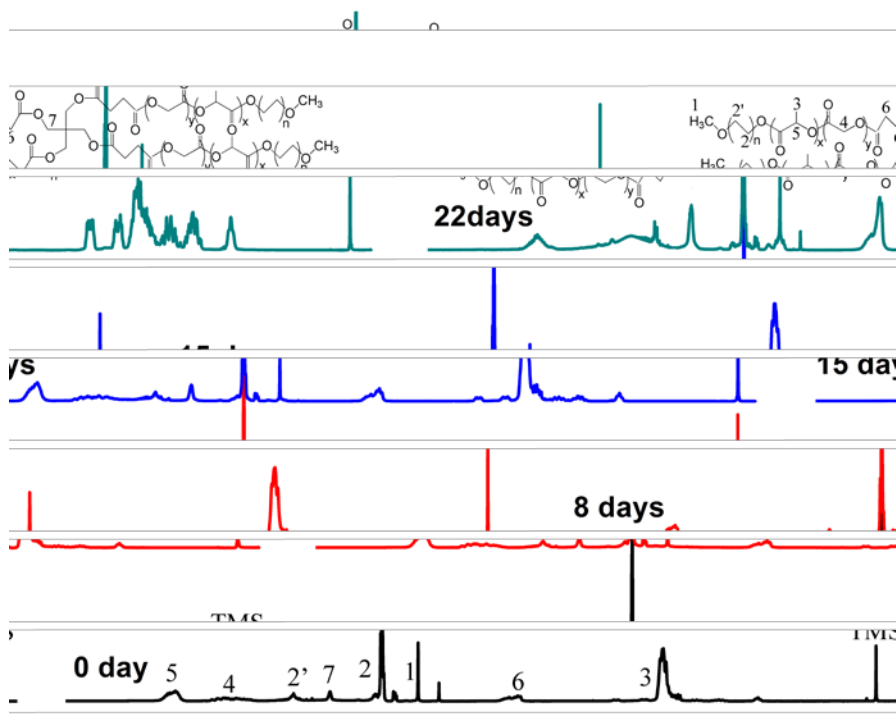

**Figure 2s.** Changes in  $^1\text{H}$  NMR spectrum during the in vivo degradation of remaining 4sPLGA1320-mPEG550 copolymers with LA/GA mol ratio=3:1 in  $\text{CDCl}_3$ .

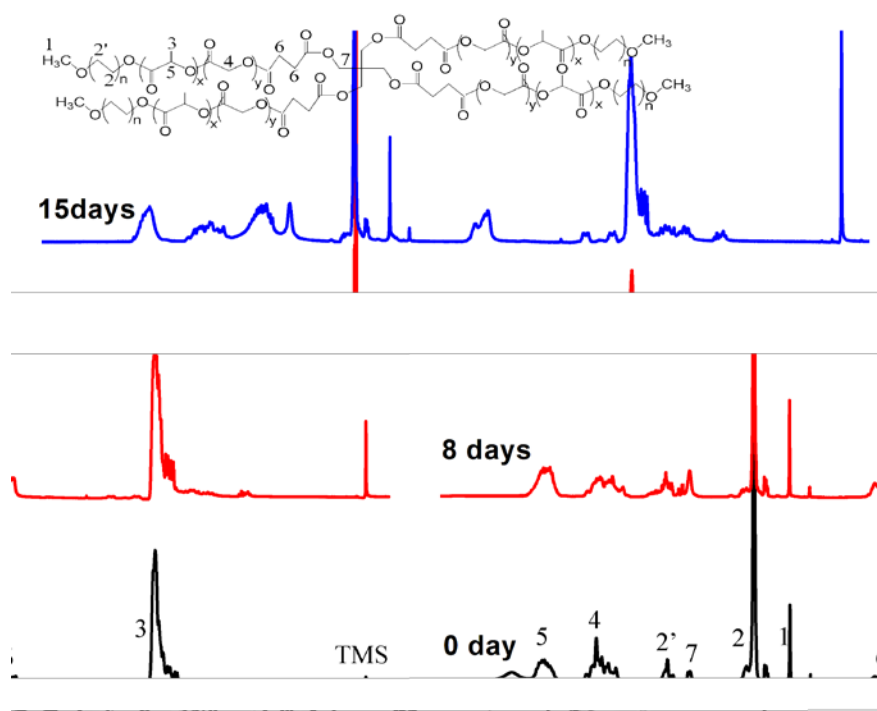

**Figure 3s.** Changes in <sup>1</sup>H NMR spectrum during the in vivo degradation of remaining 4sPLGA1320-mPEG550 copolymers with LA/GA mol ratio=1:1 in CDCl<sub>3</sub>.
